# Supplementary material for: The Route from the Folded to the Amyloid State: Exploring the Potential Energy Surface of a Drug‐Like Miniprotein
Source: PubMed Central journal article supplement (PMC7028080; doi:10.1002/chem.201903826), 2019-12-27
Supplement: CHEM-26-1968-s001.pdf [file CHEM-26-1968-s001.pdf]

# CHEMISTRY

## A **European** Journal

### Supporting Information

#### **The Route from the Folded to the Amyloid State: Exploring the Potential Energy Surface of a Drug-Like Miniprotein**

Nóra Taricska,<sup>[a]</sup> Dániel Horváth,<sup>[a]</sup> Dóra K. Menyhárd,<sup>[a]</sup> Hanna Ákontz-Kiss,<sup>[a]</sup> Masahiro Noji,<sup>[b]</sup>  
Masatomo So,<sup>[b]</sup> Yuji Goto,<sup>[b]</sup> Toshimichi Fujiwara,<sup>[b]</sup> and András Perczel\*<sup>[a]</sup>

chem\_201903826\_sm\_miscellaneous\_information.pdf

# Supporting Information

## Methods

**NMR experiments:** Datasets were collected on a 16.4 T Bruker Avance III spectrometer equipped with a 5 mm inverse TCI probe-head with z-gradient. Each sample contained 700-900  $\mu\text{M}$  of E5 miniprotein, 10%  $\text{D}_2\text{O}$ , 0.1 mM  $\text{NaN}_3$  and DSS as an internal proton reference standard. The concentrations were determined by Nanodrop. The sample pH was set between  $\text{pH}=7.1$  and  $2.0$  by using  $0.1\text{ M}$  NaCl or HCl and the measurements were recorded from  $277.0\text{ K}$  to  $321\text{ K}$  by equal steps of  $11\text{ K}$ . Spinlock (d9) for  $^1\text{H}$ - $^1\text{H}$  TOCSY was  $80\text{ ms}$ , while the mixing time (d8) of  $150\text{ ms}$  was taken for  $^1\text{H}$ - $^1\text{H}$  NOESY spectra. Raw spectra were processed by TopSpin 3.2 and the homonuclear proton NMR assignments were made using CcpNmr Analysis 2.4.1<sup>1</sup>. The NMR structure calculations were performed and refined by cooperative use of CcpNmr Analysis 2.4.1., Aria 2.0<sup>2</sup> and CNS Solve 1.2.<sup>3</sup> The NOE cross-peak intensities were converted into distance. The peak volume scaling factor is defined such that the peak list's average volume corresponds to the default  $3.2\text{ Angstroms}$ . Each ensemble was refined in water and contains  $50$  structures.

**Molecular dynamics simulations:** MD simulation were carried out as implemented in GROMACS59, using the AMBER-ff99SBildnp\* force field. The systems were solvated with TIP3P water molecules in dodecahedral boxes with a size allowing  $10\text{ \AA}$  between any protein atom and the box. The total charge was neutralized and physiological salt concentration was set using  $\text{Na}^+$  and  $\text{Cl}^-$  ions. Energy minimization of starting structures was followed by sequential relaxation of constraints on protein atoms in three steps and an additional NVT step ( $100\text{ ps}$ ) to stabilize pressure. Trajectories of  $600$  ((E5)<sub>4</sub> models) -  $1000\text{ ns}$  (E5 monomers) NPT simulations with a  $2\text{ fs}$  time step at  $310\text{ K}$  and  $328\text{ K}$  and  $1\text{ bar}$  were collected (with snapshots at every  $4\text{ ps}$ ). The last  $500\text{ ns}$  of the trajectories were clustered fitting the main-chain atoms using a  $1\text{ \AA}$  cutoff in case of the monomers, while the last  $400\text{ ns}$  of the trajectories of the tetramer sheets were clustered using a  $1.7\text{ \AA}$  cutoff fitting the main-chain atoms of the seed segment (residues 6-13).  $112$  clusters were found (95% of the snapshots are in  $32$  clusters). For docking 4-stranded seed models to one-another, we choose six different 4-stranded sheet conformer (middle structures of six different clusters from the MD simulation of the (E5<sub>pH=4.1</sub>[<sup>1</sup>E<sub>-1</sub>, <sup>2</sup>E<sub>0</sub>, <sup>3</sup>E<sub>0</sub>, <sup>14</sup>E<sub>0</sub>])<sub>4</sub> microstate with an YW offset) which were docked to another identical 4-stranded sheet, using Piper<sup>4</sup>. During docking the side chains were rigid,  $10000$  ligand rotations were probed and the  $30$  largest clusters were chosen for further analysis. We selected manually the most relevant amyloid-like structures from the clusters (less than  $45^\circ$  angle between the strands, the plane of the sheets close to parallel): these were  $10$ - $24\%$  of the total  $30$  clusters. The distance of the  $\beta$ -sheets was measured as the backbone distance the aromatic residues of the two middle chains between the two opposite sheets of the amyloid seed region (residues 6-13).

**Electronic circular dichroism spectroscopy:** Far- and near-UV ECD measurements were carried out on a Jasco J810 spectrophotometer in  $1.0$  and  $10\text{ mm}$  quartz cuvettes. Typically we used spectral scanning speed of  $50\text{ nm/min}$  with  $1\text{ nm}$  bandwidth and the  $0.2\text{ nm}$  step resolution over wavelength range  $185$ - $260\text{ nm}$  (far-UV) and  $240$ - $325\text{ nm}$  (near-UV) with three and four scans averaged for each spectrum. The temperature at the cuvette was controlled by Peltier-type heating system (temperature dependent measurements were made from  $5\text{ }^\circ\text{C}$  to  $85\text{ }^\circ\text{C}$  in  $5\text{ }^\circ\text{C}$  steps and the amyloid samples were measured at  $25\text{ }^\circ\text{C}$ ). The raw ellipticity data were converted into mean residue molar ellipticity units ( $[\theta]_{\text{MR}}/\text{deg}\cdot\text{cm}^2\cdot\text{dmol}^{-1}$ ) for the far-UV region and molar ellipticity ( $[\theta]/\text{deg}\cdot\text{cm}^2\cdot\text{dml}^{-1}$ ) for the near-UV region.

**CCA+ deconvolution:** During deconvolution of amyloid formation we used the temperature dependent ECD spectra of E5 (as folded) and E0 (as unfolded) miniprotein. (These spectra were measured from  $5\text{ }^\circ\text{C}$  to  $85\text{ }^\circ\text{C}$  for  $5\text{ }^\circ\text{C}$  step ( $17$  spectra/miniprotein)). This resulting matrix was deconvoluted into  $3$  components and then reported in a barycentric coordinate system.

**TEM measurement:** Sample solution ( $5\text{ }\mu\text{L}$ ) was spotted onto a collodion-coated copper grid (Nisshin EM Co., Tokyo, Japan). After  $1\text{ min}$ , the remaining solution was removed with filter paper and  $5\text{ }\mu\text{L}$  of  $2\%$  (w/v) ammonium molybdate was spotted onto the grids. After  $1\text{ min}$ , the remaining solution was removed in the same manner. TEM images were obtained with a Hitachi H-7650 transmission electron microscope (Tokyo, Japan) with a voltage of  $80\text{ kV}$ .

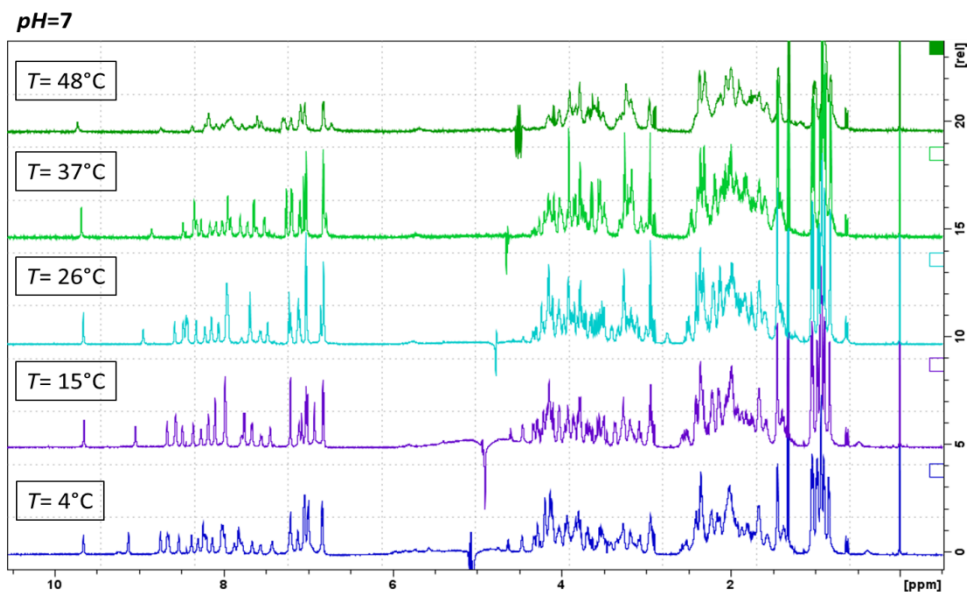

**Figure 1.**  $^1\text{H}$ -NMR spectra of E5 ( $pH=7$ ,  $0.78$  mM) as a function of the  $T(^{\circ}\text{C})$ . The dispersed chemical shifts indicate a single time-average compact fold of the protein between  $4$  to  $37^{\circ}\text{C}$ , signaling some reversible unfolding at  $48^{\circ}\text{C}$  and above (data not shown).

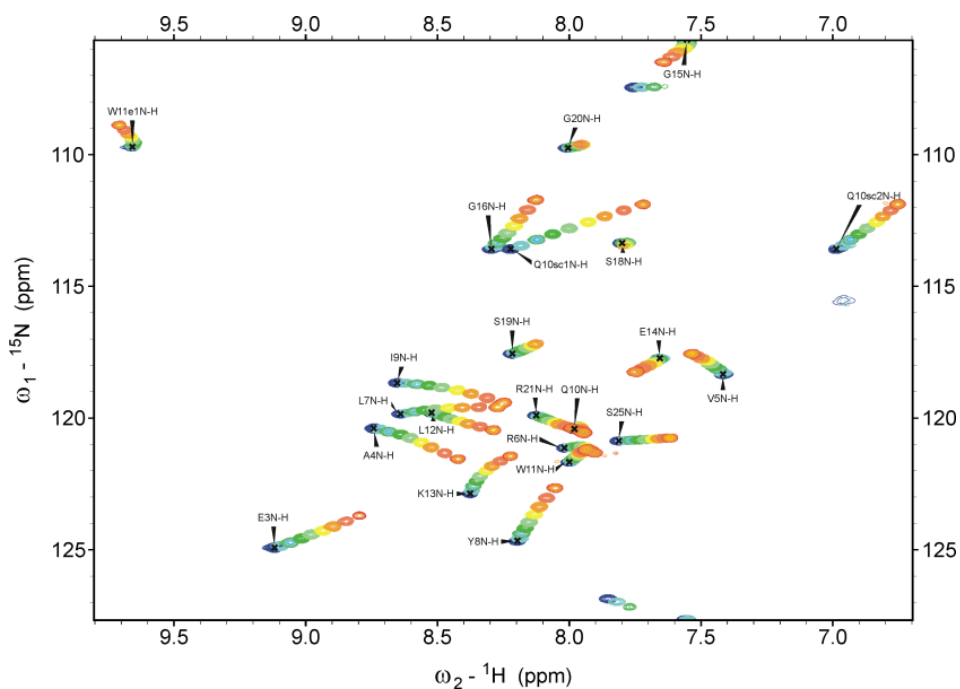

**Figure 2.** The temperature ( $5 \leq T(^{\circ}\text{C}) \leq 55$ ) dependent  $^1\text{H}$ - $^{15}\text{N}$ -HSQC of E5  $pH=7$ . The curved (non-linear) temperature induced NH chemical shift changes are indicative of the I-state of selected amino acid residues: moderate for  $\text{A}^4$ ,  $\text{V}^5$ ,  $\text{Y}^8$  and pronounced **non-linearity** is measured for  $\text{L}^7$ ,  $\text{I}^9$ ,  $\text{K}^{13}$  residues. The F-state structure of E5 colored according to the prevalence of an I-state, H-EEEAVRLYIQWLKEGGPSSGRPPPS-OH: lower probability orange, higher red.

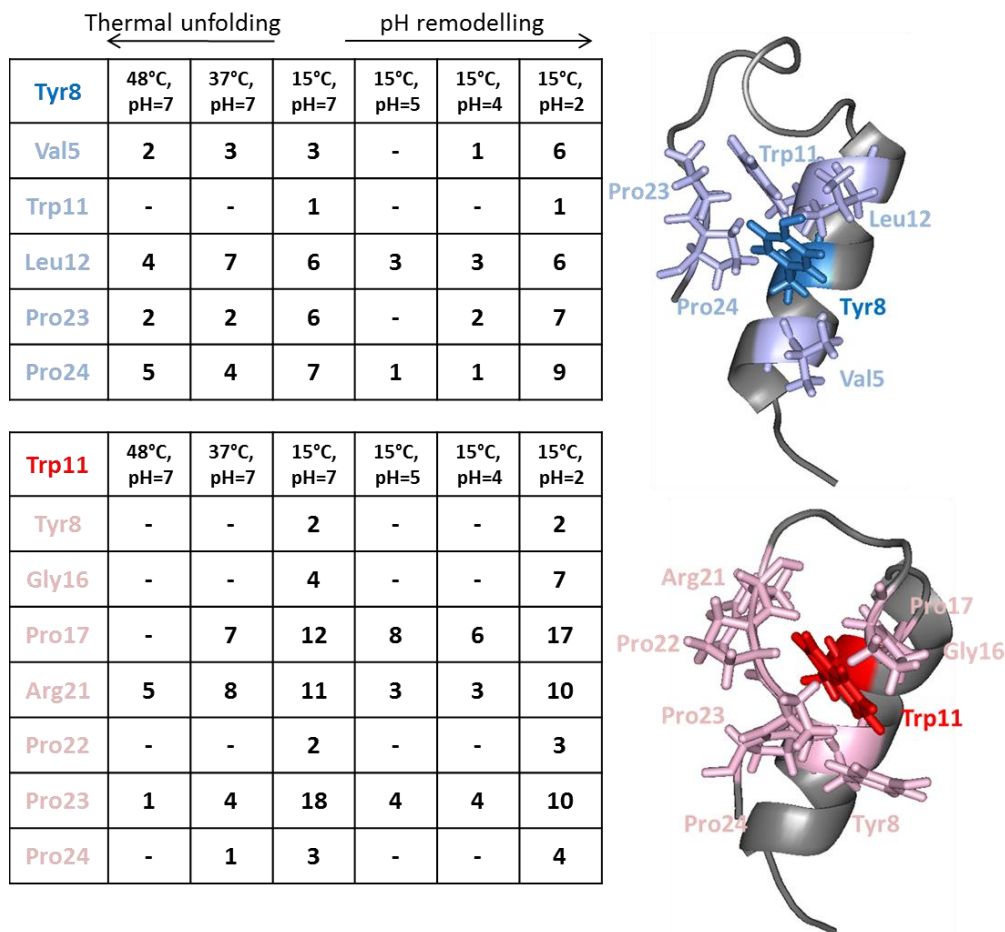

**SFigure 3.** The residue specific interaction matrix indicating the 3D-fold compactness of E5 as function of the  $pH$  and  $T$ : the total number of distance restrains  $i \rightarrow (i+3)$  and longer) between selected residues of the protein core (Tyr<sup>8</sup> ↔ Xxx and Trp<sup>11</sup> ↔ Xxx) are depicted.

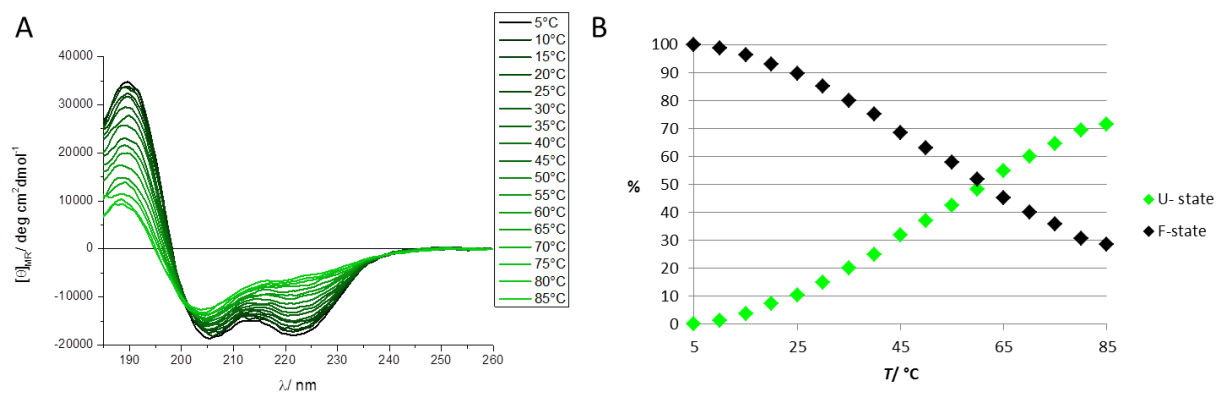

**SFigure 4.** **A)** Temperature dependent far-UV ECD spectra of E5 miniprotein at  $pH= 7.0$ . **B)** The ensemble deconvolution of the 17 spectra gives a quantitative measure of the folded and unfolded fraction of the protein at any temperature ( $5 \leq T(^{\circ}C) \leq 85$ ).

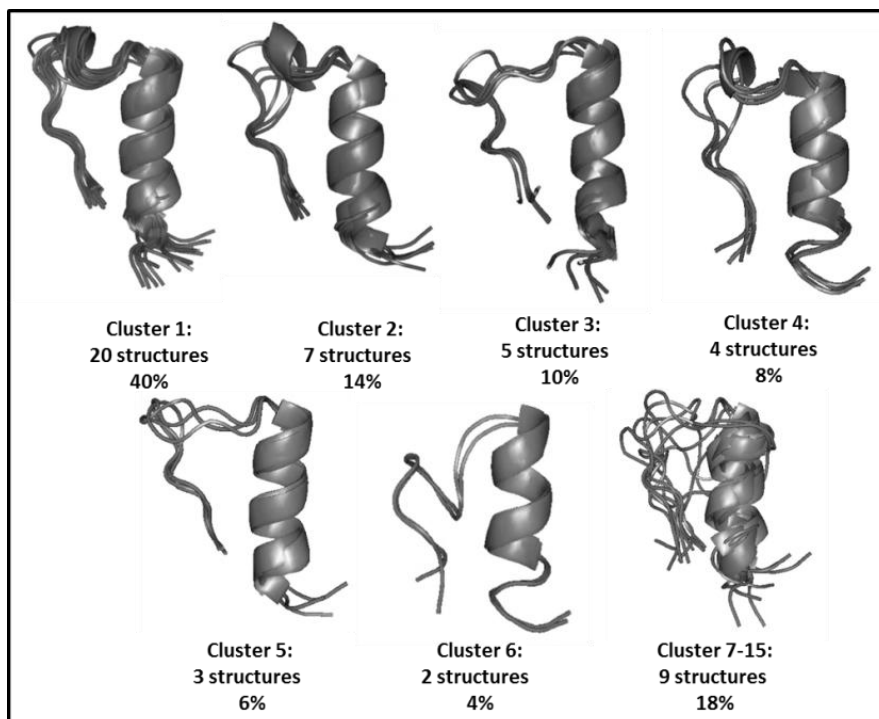

**Figure 5.** The best 50 E5 structures determined by NMR at the amyloidogenic  $pH= 4.1$  ( $T= 15$  °C). 339 restraints in total ( $\sum NOE^{i \rightarrow (i+5<)} = 22$ ), with an 1.5 nm cutoff for all backbone atoms RMSD were used for clustering.

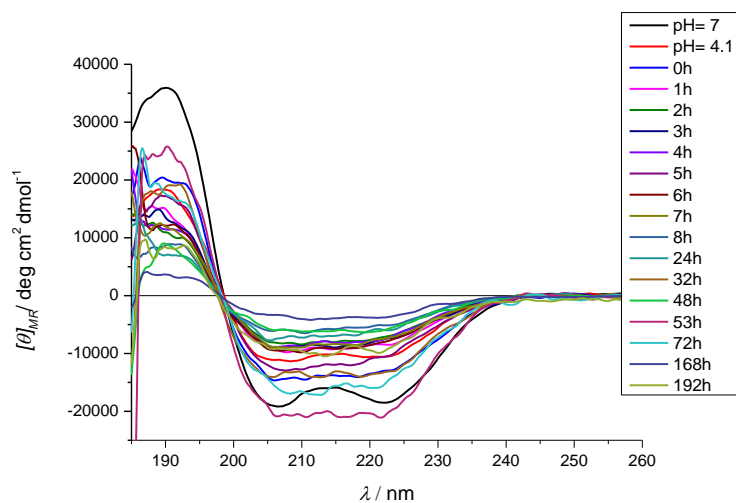

**Figure 6.** In the absence of stirring or sonication the gradual decay of the far-UV ECD spectrum intensities of E5 was detected:  $C_{E5} = 250$   $\mu\text{M}$ ,  $C_{NaCl} = 50$  mM,  $pH = 4.1$ ,  $T = 37$  °C.

| t/h | $p_F$ | $p_U$ | $p_{Amy}$ |
|-----|-------|-------|-----------|
| 0   | 0.69  | 0.24  | 0.07      |
| 1   | 0.48  | 0.41  | 0.11      |
| 2   | 0.46  | 0.45  | 0.09      |
| 3   | 0.38  | 0.46  | 0.16      |
| 4   | 0.34  | 0.46  | 0.2       |
| 4.5 | 0.33  | 0.47  | 0.2       |
| 5   | 0.26  | 0.50  | 0.24      |
| 5.5 | 0.14  | 0.50  | 0.36      |
| 6.5 | 0.12  | 0.46  | 0.42      |
| 7   | 0.1   | 0.42  | 0.48      |
| 7.5 | 0.07  | 0.36  | 0.57      |
| 8   | 0.05  | 0.37  | 0.58      |
| 51  | 0     | 0     | 1.0       |

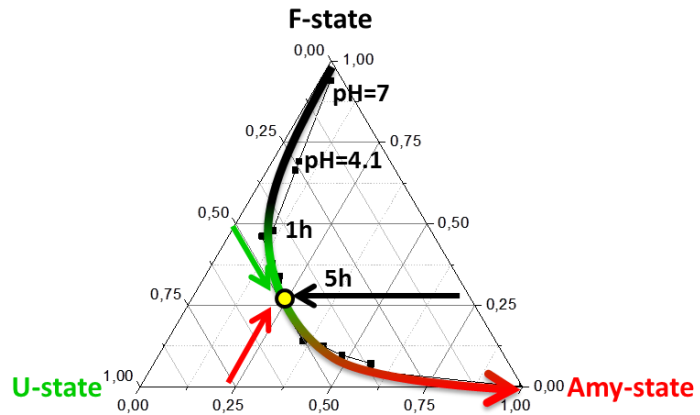

**Figure 7.** A CCA+ resulted in relative coefficients of the pure ECD curves tabulated and reported in a Barycentric coordinate system (conditions used were:  $c_{ES} = 250 \mu\text{M}$ ,  $c_{NaCl} = 50 \text{ mM}$ ,  $pH = 4.1$ , and stirring at  $T = 37 \text{ }^\circ\text{C}$ ).

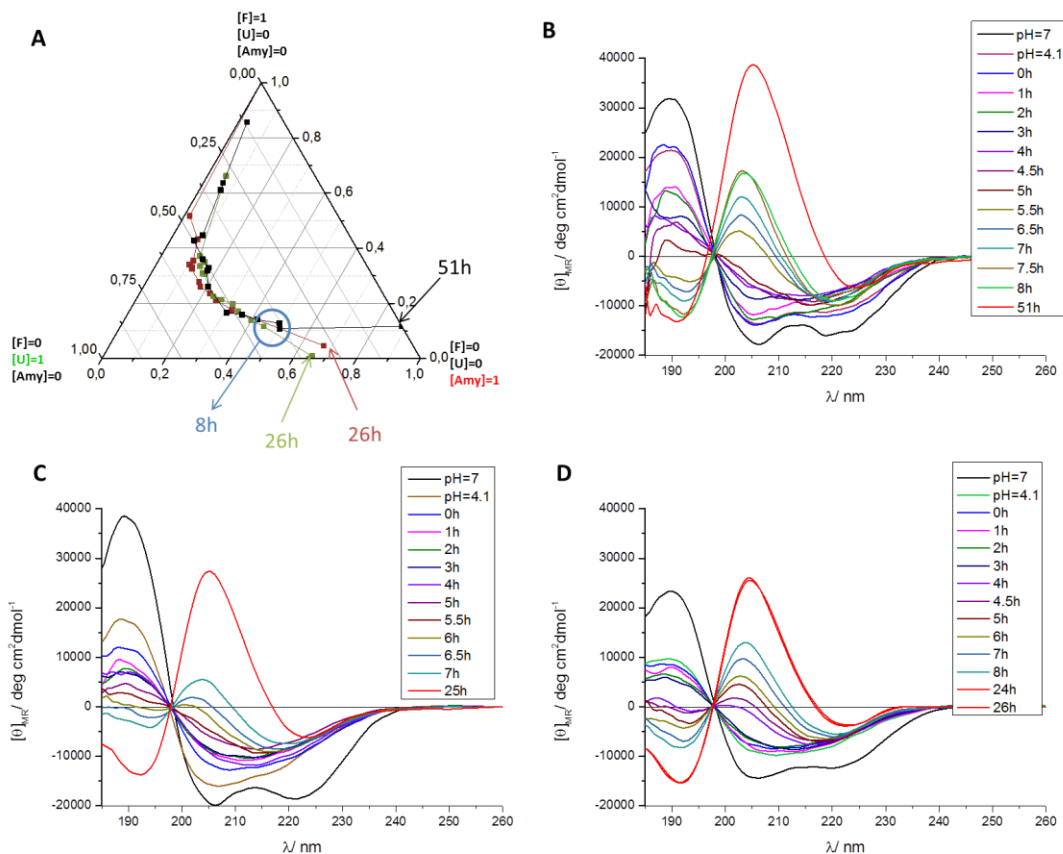

**Figure 8.** Amyloid forms at a large concentration range: from  $c_{ES} = 250 \mu\text{M}$  &  $c_{NaCl} = 50 \text{ mM}$  up to  $c_{ES} = 800 \mu\text{M}$  &  $c_{NaCl} = 12.5 \text{ mM}$ . (A) The pinpointed pathways and formation rate looks similar [ $c_{ES} = 250 \mu\text{M}$  &  $c_{NaCl} = 50 \text{ mM}$  (black) and  $c_{ES} = 500 \mu\text{M}$  &  $c_{NaCl} = 25 \text{ mM}$ , (claret) and  $c_{ES} = 800 \mu\text{M}$  &  $c_{NaCl} = 12.5 \text{ mM}$ , (green) ( $pH = 4.1$  & stirring at  $T = 37 \text{ }^\circ\text{C}$ )]. Conformational changes determined by FUV-ECD as function of the time, during amyloid formation at  $c_{ES} = 250 \mu\text{M}$  &  $c_{NaCl} = 50 \text{ mM}$  (B) and  $c_{ES} = 500 \mu\text{M}$  &  $c_{NaCl} = 25 \text{ mM}$ , (C) and  $c_{ES} = 800 \mu\text{M}$  &  $c_{NaCl} = 12.5 \text{ mM}$  (D) at  $pH = 4.1$ , stirring at  $T = 37 \text{ }^\circ\text{C}$ .

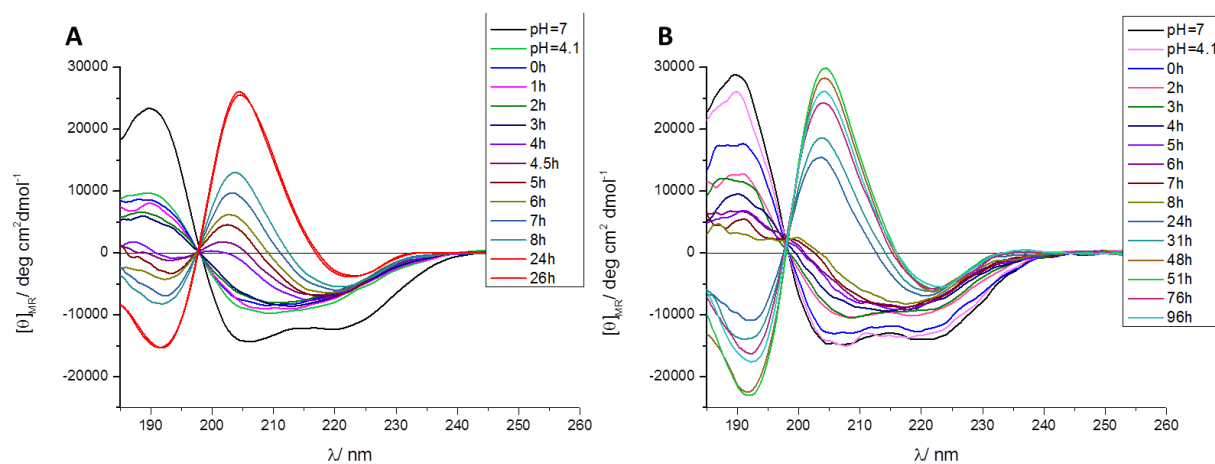

**Figure 9.** Conformational changes determined by FUV-ECD as function of the time, during amyloid formation at  $c_{ES} = 800 \mu\text{M}$ ,  $c_{NaCl} = 12.5 \text{ mM}$  (A) and  $c_{ES} = 400 \mu\text{M}$ ,  $c_{NaCl} = 12.5 \text{ mM}$  (B) at  $pH = 4.1$ , stirring at  $T = 37 \text{ }^\circ\text{C}$ .

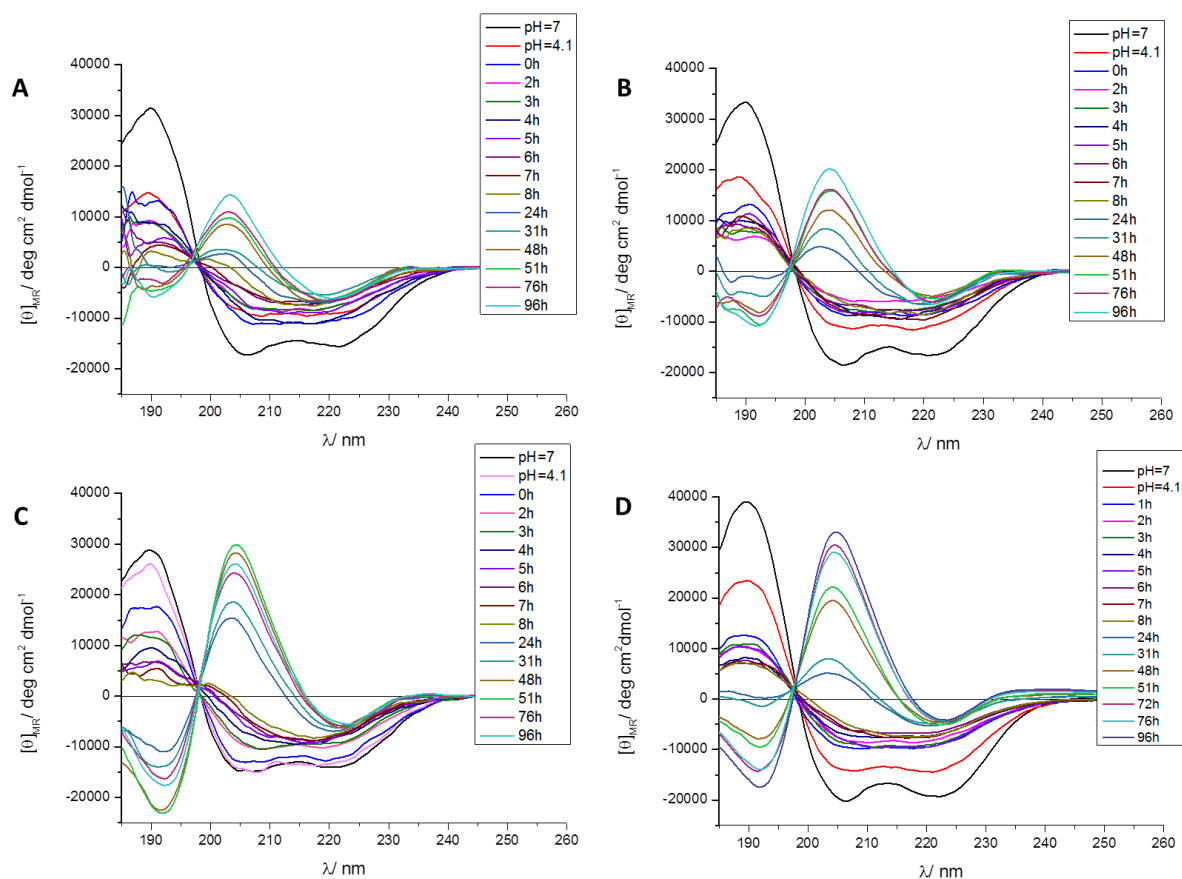

**Figure 10.** Conformational changes determined by FUV-ECD as function of the time during amyloid formation at  $c_{ES} = 400 \mu\text{M}$ ,  $c_{NaCl} = 50 \text{ mM}$  (A) and  $c_{ES} = 400 \mu\text{M}$ ,  $c_{NaCl} = 25 \text{ mM}$  (B) and  $c_{ES} = 400 \mu\text{M}$ ,  $c_{NaCl} = 12.5 \text{ mM}$  (C) and  $c_{ES} = 400 \mu\text{M}$ ,  $c_{NaCl} = 0 \text{ mM}$  (D) at  $pH = 4.1$ , stirring at  $T = 37 \text{ }^\circ\text{C}$ .

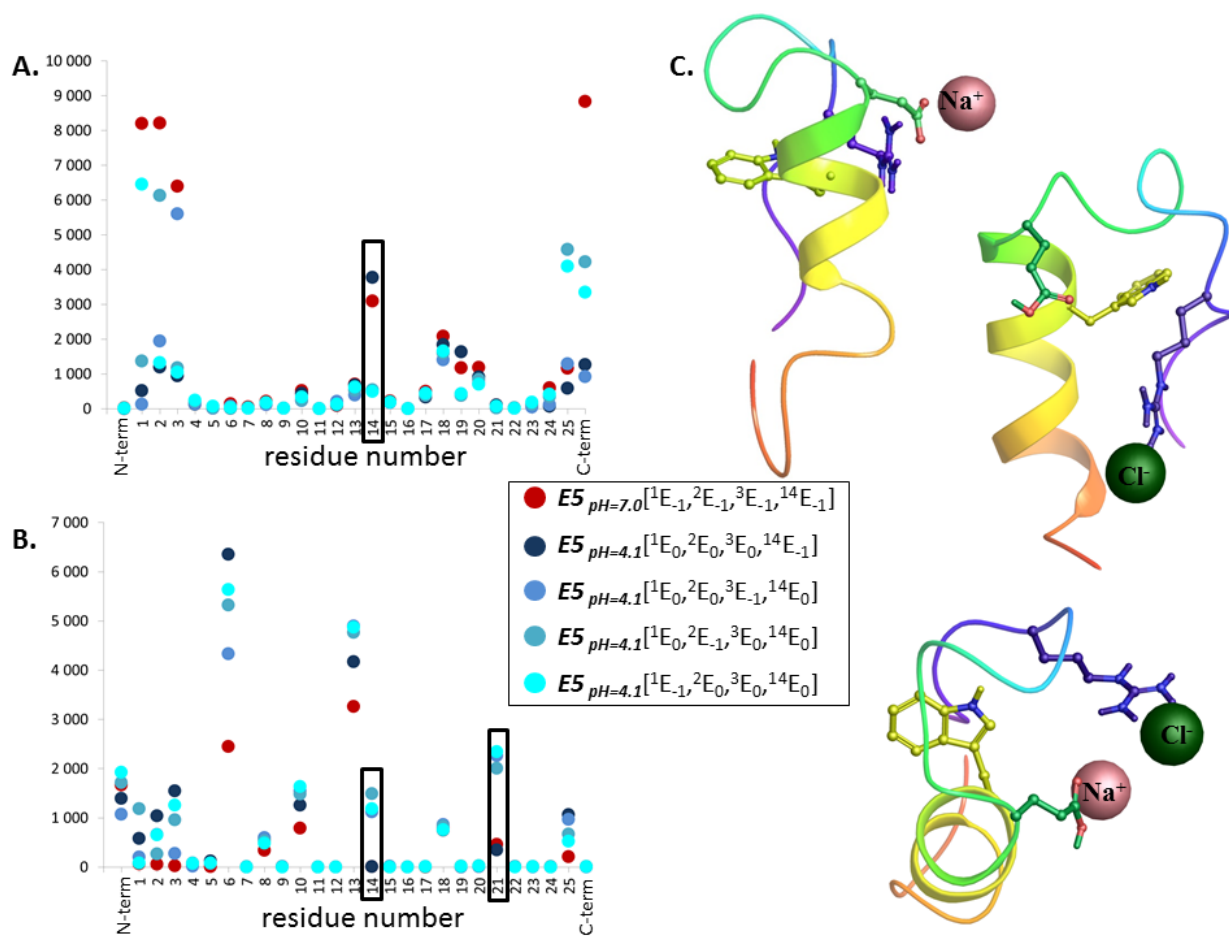

**Figure 11.** Spatial distribution of  $\text{Na}^+$  and  $\text{Cl}^-$  ions near ( $<3.5 \text{ \AA}$ ) the heteroatoms of E5. The number of  $\text{Na}^+$  (**A**) and  $\text{Cl}^-$  (**B**) ions found within interacting distance of the individual residues during the last 500 ns (125000 snapshots) of the MD simulations of the monomeric E5 at different  $\text{pH}$  dependent protonation microstates. **C**) Examples of ion-protein interactions selected from the MD simulations.



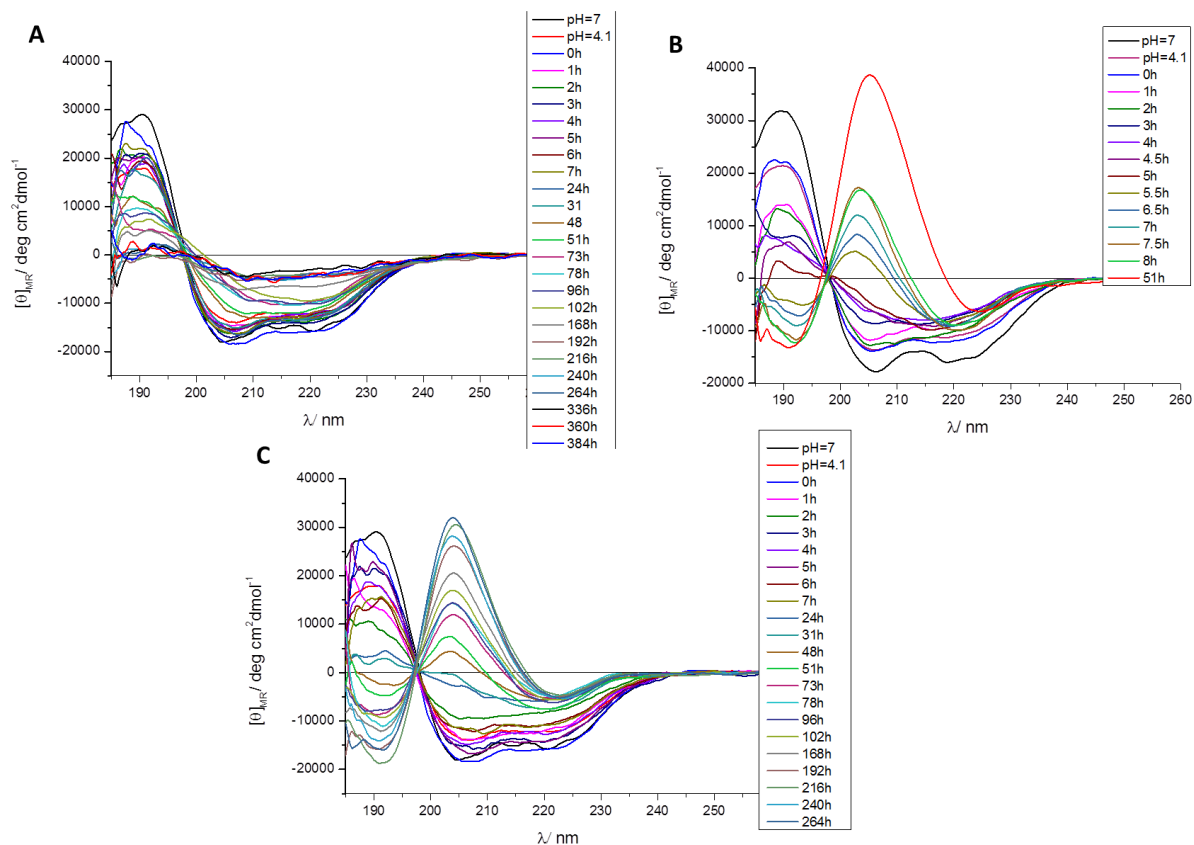

**Figure 12.** Conformational changes determined by FUV-ECD as function of the time during amyloid formation at  $c_{E5} = 250 \mu\text{M}$ ,  $c_{\text{NaCl}} = 50 \text{ mM}$ ,  $\text{pH} = 4.1$  stirring at  $T = 23^\circ\text{C}$  (A) and at  $T = 37^\circ\text{C}$ , (B) at  $T = 47^\circ\text{C}$  (C).

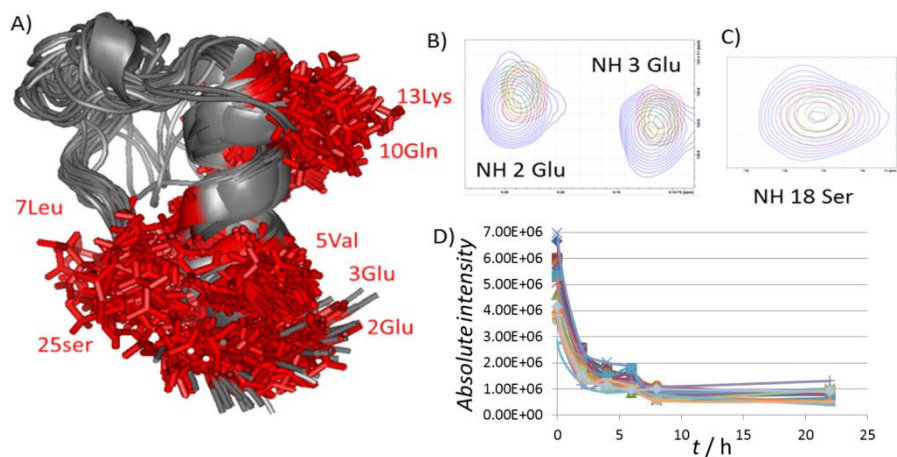

**Figure 13.** A) The superimposed best 50 structures of E5. NHs of Glu<sup>2</sup>, Glu<sup>3</sup>, Val<sup>5</sup>, Leu<sup>7</sup>, Gln<sup>10</sup>, Lys<sup>13</sup> and Ser<sup>25</sup> (highlighted red) shift the most during amyloid forming (STable 2). B) Selected  $^1\text{H}$ - $^{15}\text{N}$ -HSQC resonances of E5 shifting noticeably:  $t_{\text{end}} - t_0 > 0.047$  ppm. C) NH of Ser<sup>18</sup> shifting none was used as a reference. D) The absolute intensity of the  $^1\text{H}$ - $^{15}\text{N}$ -HSQC resonances decay with time, indicating the loss of monomers and shorter oligomeric assemblies.

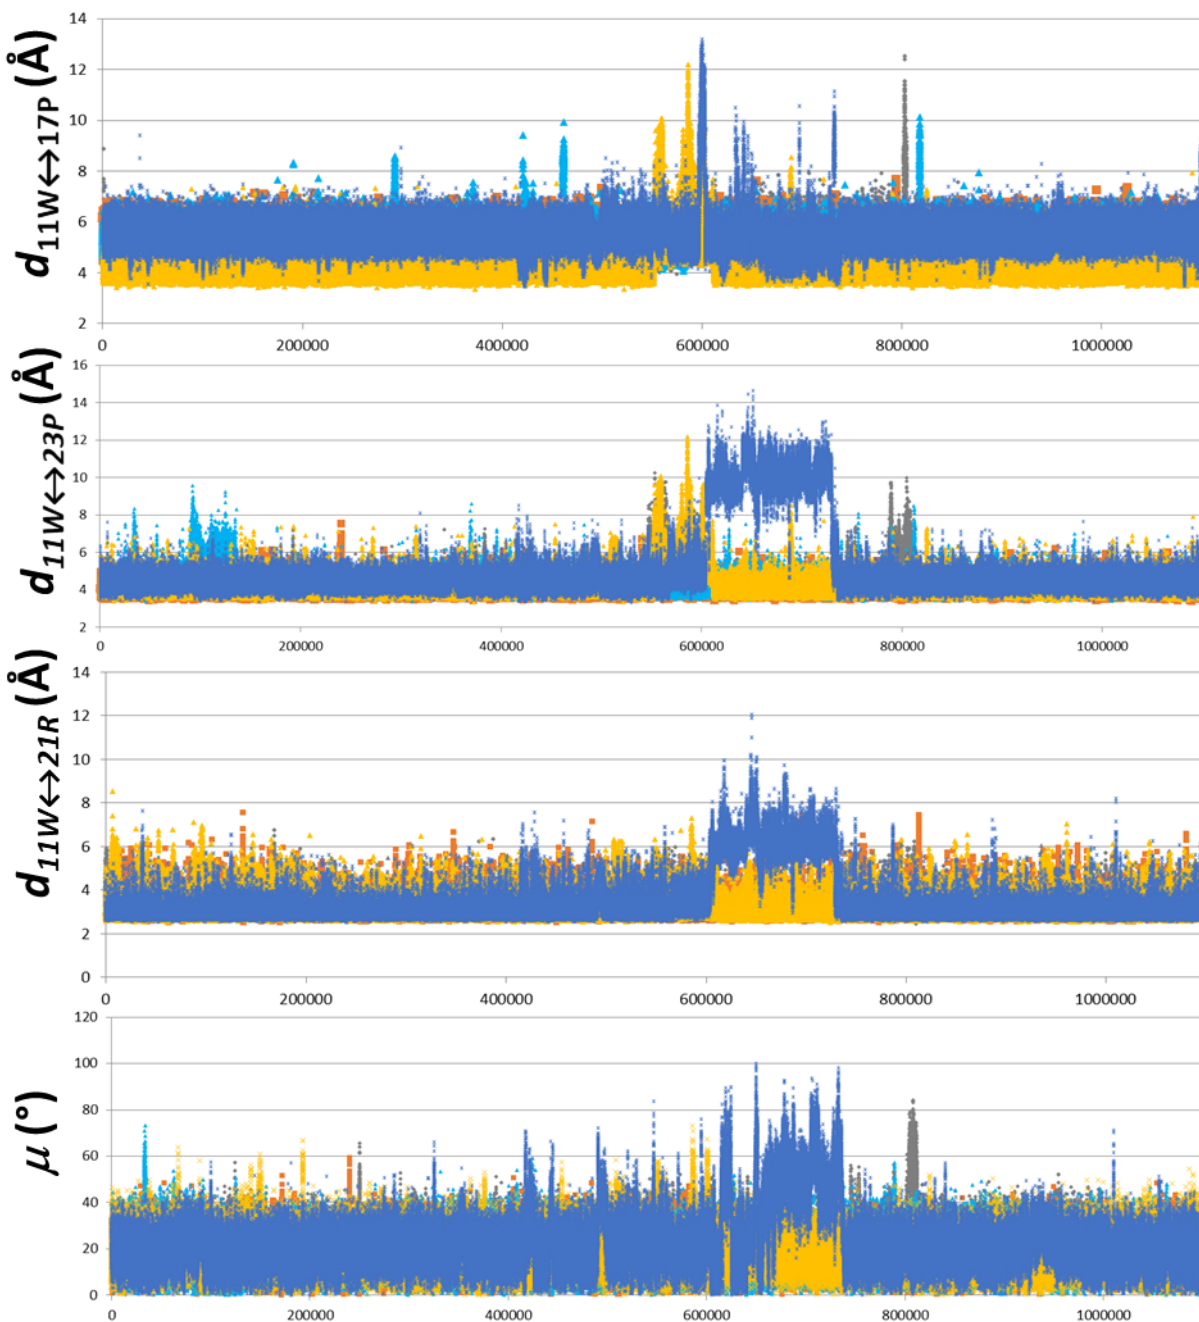

**Figure 14.** Conformational measures signaling the degree of misfolding of E5 as function of the time for each trajectory. Grey indicates the measures of  $\text{E5}[^1\text{E}_{-1}, ^2\text{E}_{-1}, ^3\text{E}_{-1}, ^{14}\text{E}_{-1}]$  microstate, orange stands for  $\text{E5}[^1\text{E}_0, ^2\text{E}_0, ^3\text{E}_0, ^{14}\text{E}_{-1}]$ ; light blue for  $\text{E5}[^1\text{E}_0, ^2\text{E}_0, ^3\text{E}_{-1}, ^{14}\text{E}_0]$ ; yellow for  $\text{E5}[^1\text{E}_0, ^2\text{E}_{-1}, ^3\text{E}_0, ^{14}\text{E}_0]$  and deep blue for  $\text{E5}[^1\text{E}_{-1}, ^2\text{E}_0, ^3\text{E}_0, ^{14}\text{E}_0]$ . Between 600-800 ns time window of the trajectory a significant change is reported by the measures in the single case of  $\text{E5}[^1\text{E}_{-1}, ^2\text{E}_0, ^3\text{E}_0, ^{14}\text{E}_0]$ , namely the opening event of the Trp-cage.

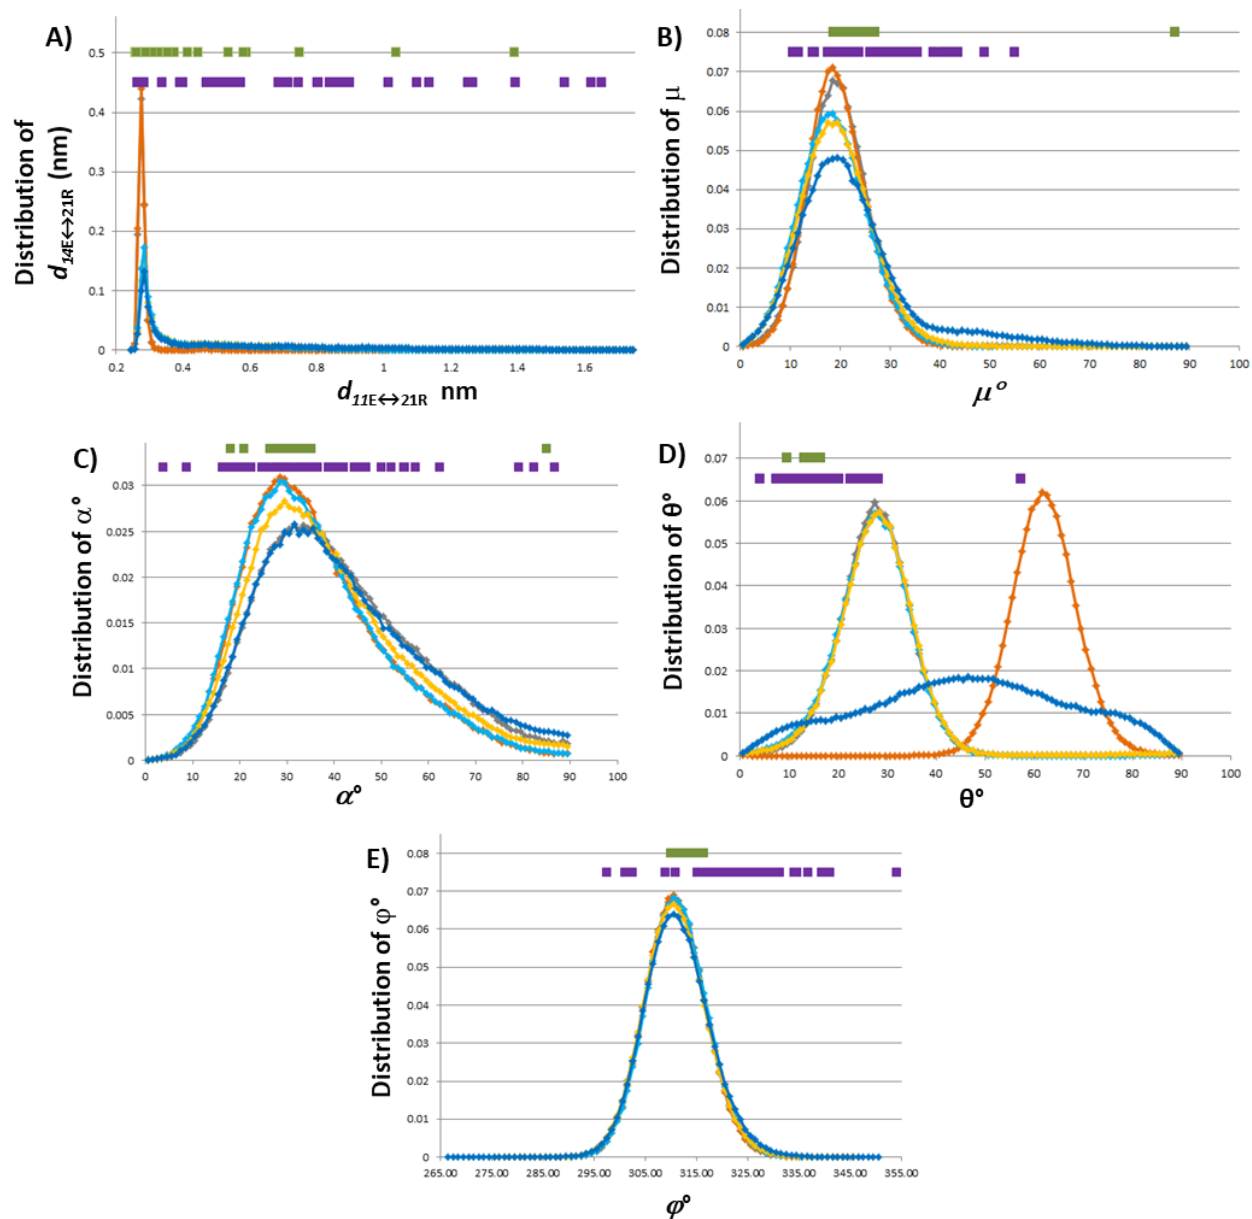

**Figure 15.** Additional distributions of conformational measures are selected to signal the degree of misfolding of E5. **A-E)** The distribution of the selected measures for the MD trajectories (grey –  $pH=7$ ,  $E5[{}^1E_{-1}, {}^2E_{-1}, {}^3E_{-1}, {}^{14}E_{-1}]$ ; orange –  $pH=4.1$   $E5[{}^1E_0, {}^2E_0, {}^3E_0, {}^{14}E_{-1}]$ ; light blue –  $pH=4.1$   $E5[{}^1E_0, {}^2E_0, {}^3E_{-1}, {}^{14}E_0]$ ; yellow –  $pH=4.1$   $E5[{}^1E_0, {}^2E_{-1}, {}^3E_0, {}^{14}E_0]$ ; blue –  $pH=4.1$   $E5[{}^1E_{-1}, {}^2E_0, {}^3E_0, {}^{14}E_0]$ ) are plotted, while the distribution of the selected measures for NMR structures (green –  $pH=7$ , purple –  $pH=4.1$ ) are indicated for every single structures above the MD distribution curves in a linear 1D manner. Measures of A) and B) characterize the tertiary structure of the Trp-cage, while measures of C, D, E describe the spatial arrangement of the aromatic rings (Trp<sup>8</sup>, Trp<sup>11</sup>).

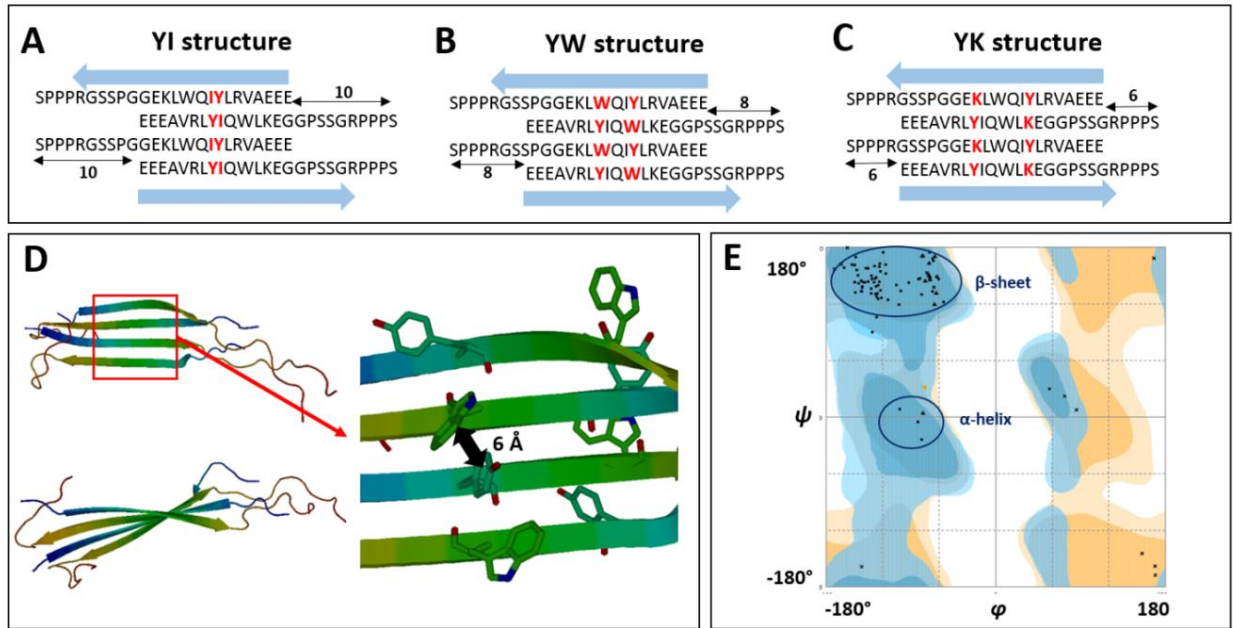

**SFigure 16. A-C)** The three different  $\beta$ -strand offsets of  $(E5)_4$  used for MD simulations. In each of the composed models, the central helix was extended and Tyr<sup>8</sup> was paired antiparallel either with Ile<sup>9</sup>, Trp<sup>11</sup> or Lys<sup>13</sup> residues of the adjacent  $\beta$ -strand. **D)** The most populated amyloid-like tetramer cluster of YW ( $pH= 4.1$  between 100-340 ns) have shifted face-to-face  $\pi$ - $\pi$  aromatic ring orientations (with ring separations of  $\sim 6$  Å). On the contrary, neither YI, nor YK offsets made stable enough tetramers. **E)** The Ramachandran plot of the most populated cluster of the  $(E5)_4$  YW structure with residues mainly located in the  $\beta$ -valley.

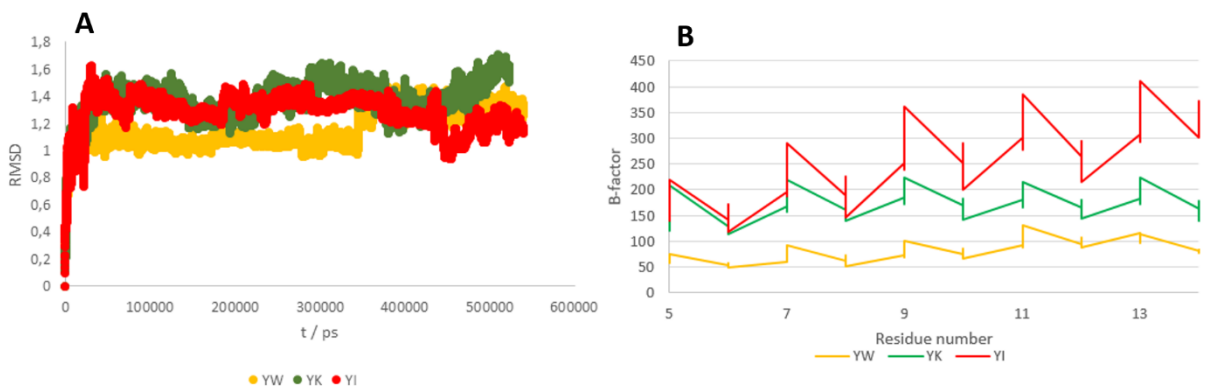

**SFigure 17.** RMSD values of the backbone of the full sequence (**A**) and B-factors of the backbone of the core region ( $V^5$ - $K^{13}$ ) of the two middle chains (**B**) of the tested offsets (YW, YK and YI) at  $pH= 4.1$ . The YW offset has the most stable backbone at region  $V^5$ - $K^{13}$ , which is the aggregation core.

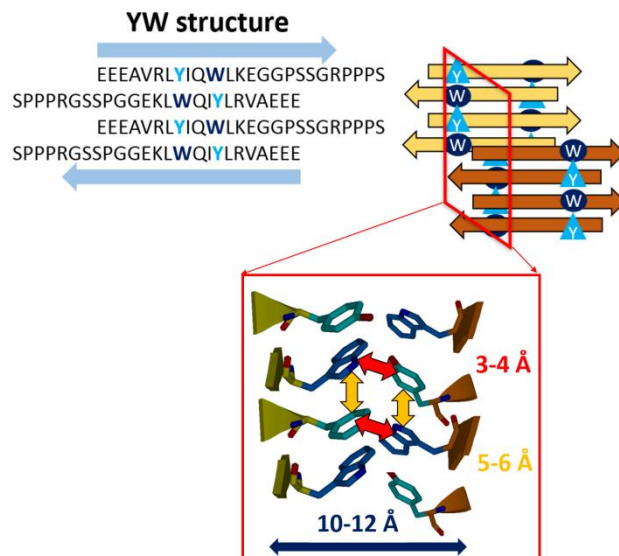

**Figure 18.** Schematic illustration of a hypothetical late phase intersheet orientation of the aromatic rings (Tyr: light blue, Trp: dark blue). The intrasheet distance between the center of masses of the two aromatic side chains is 5-6 Å (yellow double arrows), while possible intersheet aromatic-aromatic distance can be 3-4 Å (red double arrows), while the sheet-sheet distance is 10-12 Å (blue double arrow).

**Table 1.:** Conditions applied for  $^1\text{H}$ - $^1\text{H}$ -NOESY experiments (the resolution was always  $2\text{k} \times 512$ ), and selected structural results retrieved.

| $T / \text{K}$ | $\text{pH}$ | Concentration              | ns       | Assigned crosspeaks | $\Sigma\text{NOE}^{i \rightarrow (i+5<)}$ | Backbone all atoms RMSD (Å) |
|----------------|-------------|----------------------------|----------|---------------------|-------------------------------------------|-----------------------------|
| 277            | 7           | 1.295mg/600 $\mu\text{l}$  | 32       | 666                 | 90                                        | 0.705                       |
| 288            | 7           | 1.295mg/600 $\mu\text{l}$  | 32       | 590                 | 77                                        | 0.475                       |
| 299            | 7           | 1.295mg/600 $\mu\text{l}$  | 32       | 522                 | 52                                        | 0.893                       |
| 310            | 7           | 1.295mg/600 $\mu\text{l}$  | 32       | 458                 | 46                                        | 0.640                       |
| 321            | 7           | 1.295mg/600 $\mu\text{l}$  | 32       | 221                 | 16                                        | 3.401                       |
| 288            | 6           | 1.989mg/~800 $\mu\text{l}$ | 56       | 550                 | 64                                        | 0.732                       |
| 288            | 5           | 1.989mg/~800 $\mu\text{l}$ | 48       | 319                 | 16                                        | 2.564                       |
| 288            | 4           | 0.842mg/600 $\mu\text{l}$  | 128 cryo | 339                 | 22                                        | 1.833                       |
| 288            | 2           | 1.989mg/~800 $\mu\text{l}$ | 96       | 748                 | 84                                        | 0.516                       |

**Table 2.** Combined  $^1\text{H}$ - and  $^{15}\text{N}$ -chemical shift changes,  $\Delta(t_{\text{end}}) - \Delta(t_0)$ , of E5 recorded for the first 24h of the amyloid formation<sup>a</sup>

|                                        |                   |                    |                   |                   |                    |
|----------------------------------------|-------------------|--------------------|-------------------|-------------------|--------------------|
|                                        | Glu <sup>1</sup>  | Glu <sup>2</sup>   | Glu <sup>3</sup>  | Ala <sup>4</sup>  | Val <sup>5</sup>   |
| $\Delta(t_{\text{end}}) - \Delta(t_0)$ | n.d.              | 0.139 <sup>b</sup> | 0.081             | 0.013             | 0.108              |
| residue in E5                          | Arg <sup>6</sup>  | Leu <sup>7</sup>   | Tyr <sup>8</sup>  | Ile <sup>9</sup>  | Gln <sup>10c</sup> |
| $\Delta(t_{\text{end}}) - \Delta(t_0)$ | 0.011             | 0.055              | 0.014             | 0.047             | 0.079              |
| residue in E5                          | Trp <sup>11</sup> | Leu <sup>12</sup>  | Lys <sup>13</sup> | Glu <sup>14</sup> | Gly <sup>15</sup>  |
| $\Delta(t_{\text{end}}) - \Delta(t_0)$ | 0.003             | 0.036              | 0.058             | 0.024             | 0.023              |
| residue in E5                          | Gly <sup>16</sup> | Pro <sup>17</sup>  | Ser <sup>18</sup> | Ser <sup>19</sup> | Gly <sup>20</sup>  |
| $\Delta(t_{\text{end}}) - \Delta(t_0)$ | 0.029             | n.d.               | 0.020             | 0.002             | 0.030              |
| residue in E5                          | Arg <sup>21</sup> | Pro <sup>22</sup>  | Pro <sup>23</sup> | Pro <sup>24</sup> | Ser <sup>25</sup>  |
| $\Delta(t_{\text{end}}) - \Delta(t_0)$ | 0.003             | n.d.               | n.d.              | n.d.              | 0.175              |

<sup>a</sup>  $\text{pH} = 4.1$ ,  $T = 37^\circ\text{C}$ ,  $c_{\text{E5}} = 600 \mu\text{M}$ ,  $c_{\text{NaCl}} = 12.5 \text{ mM}$ ,  $\zeta = \text{stirring}$

<sup>b</sup> All changes,  $\Delta(t_{\text{end}}) - \Delta(t_0)$ , larger than the average,  $\langle \Delta \rangle = 0.047$  are highlighted red

<sup>c</sup> Gln side chain amides shift  $\langle 0.103 \rangle$  ppm

## References:

- 1 Vranken, W. F.; Boucher, W.; Stevens, T. J.; Fogh, R. H.; Pajon, A.; Llinas, M.; Ulrich, E. L.; Markley, J. L.; Ionides, J.; Laue, E.D., The CCPN data model for NMR spectroscopy: development of a software pipeline. *Proteins* **2005**, 59(4), 687-96.
- 2 Rieping, W.; Habeck, M.; Bardiaux, B.; Bernard, A.; Malliavin, T. E.; Nilges, M., ARIA2: automated NOE assignment and data integration in NMR structure calculation. *Bioinformatics* **2007**, 23(3), 381-2.
- 3 Brunger, A. T., Version 1.2 of the Crystallography and NMR system. *Nature Protocols* **2007**, 2, 2728–2733.
- 4 Kozakov, D.; Brenke, R.; Comeau, S.R.; Vajda, S. PIPER: An FFT-based protein docking program with pairwise potentials. *Proteins: Structure, Function, and Bioinformatics*. **2006**, 65(2):392-406.
